# Supplementary material for: Defining the extracellular matrix in non-cartilage soft tissues in osteoarthritis – a systematic review
Source: bioRxiv or medRxiv preprint supplement (doi:10.1101/2023.08.31.23294625), 2023-08-31
Supplement: Supplementary file [file media-1.pdf]

1016 Supplementary Information

1017

1018 **Defining the extracellular matrix in non-cartilage soft tissues in osteoarthritis – a**

1019 **systematic review**

1020 Jolet Y. Mimpfen<sup>1\*#</sup>, Iwan G. A. Raza<sup>2#</sup>, Sarah J. B. Snelling<sup>1</sup>

1021 <sup>1</sup> *Botnar Research Centre, Nuffield Department of Orthopaedics Rheumatology and Musculoskeletal*

1022 *Sciences, University of Oxford, Oxford, UK*

1023 <sup>2</sup> *Medical Sciences Division, University of Oxford, UK*

1024 # Jolet Y. Mimpfen and Iwan Raza contributed equally to this work

1025

**Supplementary Table 1.** Study characteristics of included human studies.

**Abbreviations:** ACL = anterior cruciate ligament, IQR = interquartile range, KCS = Knee Society Clinical Grading System, KL-grade = Kellgren-Lawrence grade, Med = median, NR = not reported, OA = osteoarthritis, OARSI = Osteoarthritis Research Society International, OCS = Outerbridge Classification System, PCL = posterior cruciate ligament, TKR = total knee replacement.

\* = note on the control group of Herbert (1973): although 15 participants were in the control group in total, results in this review are based on the included adults only (11 participants).

# = note on the control group of Karube (1981): although non-adult participants were included in the study, the results in this review are based exclusively on the age groups with adults only.

| First author (year) | Country | Joint | Tissue (details)        | Stage of disease / OA severity | Control population                                | No. of participants   | Female (%) | Age (mean±SD (range))                      | BMI (mean)             | Ref  |
|---------------------|---------|-------|-------------------------|--------------------------------|---------------------------------------------------|-----------------------|------------|--------------------------------------------|------------------------|------|
| Abdul Sahib (2017)  | Iraq    | Knee  | Ligament (ACL & PCL)    | NR                             | No                                                | OA: 50                | 70         | NR                                         | NR                     | [33] |
| Abraham (2014)      | USA     | Knee  | Meniscus (entheses)     | Advanced                       | Healthy tissue donors                             | OA: 7<br>Control: 8   | NR<br>NR   | NR<br>55 (41-61)                           | NR<br>NR               | [47] |
| Akisue (2002)       | Japan   | Knee  | Ligament (PCL)          | Ahlbäck grades 2-5             | Cadavers w/o knee OA                              | OA: 24<br>Control: 4  | 38<br>50   | 64.2 (40-84)<br>87 (78-98)                 | NR<br>NR               | [34] |
| Allain (2001)       | France  | Knee  | Ligament (ACL & PCL)    | TKR                            | No                                                | OA: 45                | 67         | 76 (68-84)                                 | NR                     | [35] |
| Atik (2016)         | Turkey  | Knee  | Meniscus (medial)       | Medial arthroplasty            | No                                                | OA: 12                | 100        | 64 (59-71)                                 | NR                     | [48] |
| Battistelli (2019)  | Italy   | Knee  | Meniscus                | KL grade 3-4                   | Multi-organ donors w/o history of joint disorders | OA: 3<br>Controls: 3  | 33<br>33   | Med 72 (IQR 72-73.5)<br>Med 66 (IQR 63-69) | NR<br>NR               | [49] |
| Belluzzi (2020)     | Italy   | Knee  | Fat pad (infrapatellar) | End-stage                      | ACL reconstruction, med 8 months post-injury      | OA: 25<br>Control: 28 | 72<br>25   | Med 68 (IQR 62-75)<br>Med 31 (22-42)       | Med: 29.5<br>Med: 23.0 | [31] |
| Cameron (1973)      | Canada  | Hip   | Capsule                 | End-stage                      | Not reported                                      | OA: 25<br>Control: 15 | NR<br>NR   | NR<br>NR                                   | NR<br>NR               | [25] |
| Campbell (2015)     | Canada  | Knee  | Capsule                 | Mean KL grade >3               | No                                                | OA: 21                | 57         | Mean >65                                   | NR                     | [26] |

|                          |             |       |                                   |                      |                              |                      |          |                              |                                             |       |
|--------------------------|-------------|-------|-----------------------------------|----------------------|------------------------------|----------------------|----------|------------------------------|---------------------------------------------|-------|
| Chang (2005)             | Japan       | NR    | Synovium                          | Arthroplasty         | No                           | OA: 5                | NR       | NR                           | NR                                          | [121] |
| Cheng (1996)             | Belgium     | Spine | Intervertebral disc               | KL grade 1-4         | Cadavers w/o spinal OA       | OA: 51<br>Control: 9 | 50       | 67.3 (23-87)                 | NR                                          | [32]  |
| Christensen (2019)       | Denmark     | Hip   | Synovium                          | Advanced             | No                           | OA: 6                | 3        | Med 66.5 (IQR 62–69)         | Med 30.8                                    | [108] |
| Cillero-Pastor (2015)    | Netherlands | Knee  | Synovium                          | TKR                  | Adult tissue donors          | OA: 3<br>Control: 3  | NR<br>NR | 69-82<br>60-78               | NR<br>NR                                    | [92]  |
| Cutolo (1992)            | Italy       | Knee  | Synovium                          | End-stage            | Knee trauma                  | OA: 4<br>Control: 4  | NR<br>NR | NR<br>NR                     | NR<br>NR                                    | [93]  |
| Dessombz (2013)          | France      | Knee  | Meniscus (medial)                 | KL mean grade 4      | No                           | OA: 6                | 83       | 74 (SD 9)                    | 28                                          | [50]  |
| DiCesare (1999)          | USA         | Knee  | Synovium                          | Knee replacement     | No                           | OA: 3                | NR       | NR                           | NR                                          | [94]  |
| DiFrancesco (1995)       | USA         | Hip   | Capsule                           | Advanced             | No                           | OA: 109              | 57       | 67.1 (39-92)                 | NR                                          | [27]  |
| Dijkgraaf (1997)         | Netherlands | TMJ   | Synovium                          | Early to advanced    | No                           | OA: 31               | 81       | 30.1                         | NR                                          | [119] |
| Doerschuk (1999)         | USA         | Thumb | Ligament (palmar beak)            | Mankin grades 3-14   | No                           | OA: 18               | 72       | NR                           | NR                                          | [45]  |
| Ea (2013)                | France      | Knee  | Synovium                          | KL grades 0-3        | No                           | Total: 31            | NR       | NR                           | NR                                          | [95]  |
| Ene (2015)               | Romania     | Knee  | Synovium                          | Early and late stage | No                           | OA: 43               | 77       | 49-76                        | NR                                          | [96]  |
| Exposito Molinero (2016) | Spain       | NR    | Tendon (Achilles)                 | NR                   | No                           | OA: 24               | 46       | 50.7                         | NR                                          | [131] |
| Fan (2012)               | China       | Knee  | Synovium                          | NR                   | No                           | OA: 6                | 50       | Med 60 (range 48-77)         | NR                                          | [97]  |
| Fink (2007)              | Germany     | Knee  | Skeletal muscle (vastus medialis) | KL grade 4           | No                           | OA: 78               | 79       | 68.5 (51-83)                 | <20: 3<br>20-24: 12<br>25-29: 31<br>>29: 32 | [88]  |
| Fischenich (2015)        | USA         | Knee  | Meniscus (medial & lateral)       | TKR                  | No                           | OA: 24               | 54       | 57.8 ± 4.6                   | 31.9                                        | [51]  |
| Folkesson (2020)         | Sweden      | Knee  | Meniscus (posterior)              | OCS 4 medially;      | Cadavers (w/o joint disease) | OA: 9<br>Control: 10 | 56<br>50 | 62.0 (50-75)<br>51.4 (18-77) | 29.0<br>28.0                                | [52]  |

|                     |           |          |                                      |                                          |                            |                        |          |                            |          |       |
|---------------------|-----------|----------|--------------------------------------|------------------------------------------|----------------------------|------------------------|----------|----------------------------|----------|-------|
|                     |           |          | horns of medial)                     | OCS 0-1 laterally                        |                            |                        |          |                            |          |       |
| Fuhrmann (2015)     | Germany   | Knee     | Meniscus                             | TKR                                      | No                         | OA: 9                  | 67       | 69.6 (56-80)               | NR       | [53]  |
| Ghosh (1975)        | Australia | Knee     | Meniscus                             | NR                                       | No                         | OA: 5                  | NR       | NR                         | NR       | [54]  |
| Grevenstein (2020)  | Germany   | Knee     | Fat pad (infrapatellar)              | TKR                                      | Trauma (ACL rupture)       | OA: 14<br>Control: 11  | 50<br>27 | 63.8 ± 17.6<br>33.7 ± 14.8 | NR       | [30]  |
| Haut Donahue (2021) | USA       | Knee     | Meniscus (medial & lateral entheses) | TKR                                      | No                         | OA: 7                  | NR       | 40-75                      | NR       | [55]  |
| Heinegård (1968)    | Sweden    | Knee     | Capsule                              | NR                                       | No                         | OA: 8                  | 88       | 60-80                      | NR       | [28]  |
| Herbert (1973)      | UK        | Hip      | Capsule                              | NR                                       | Cadavers w/o joint disease | OA: 12<br>Control: 11* | NR<br>NR | 30-70<br>NR                | NR<br>NR | [29]  |
| Hino (1995)         | Japan     | NR       | Synovium                             | NR                                       | No                         | OA: 4                  | NR       | NR                         | NR       | [122] |
| Hino (2020)         | Japan     | Knee     | Meniscus (posterior root)            | NR                                       | No                         | OA: 7                  | 57       | 75 (67-86)                 | NR       | [56]  |
| Ibrahim (2019)      | Sweden    | Shoulder | Tendon (biceps & subscapularis)      | Total shoulder arthroplasty              | Proximal humeral fracture  | OA: 13<br>Control: 13  | NR<br>NR | Med 67<br>Med 70           | NR<br>NR | [132] |
| Ibrahim (2021)      | Sweden    | Hip      | Tendon (Gluteus Medius)              | Total hip arthroplasty                   | Femoral head fracture      | OA: 29<br>Control: 25  | 66<br>76 | 70<br>73                   | NR<br>NR | [133] |
| Ishizuka (2016)     | Japan     | Knee     | Meniscus                             | TKR                                      | No                         | OA: 30                 | 57       | 71                         | NR       | [57]  |
| Itokazu (1998)      | Japan     | NR       | Synovium                             | NR                                       | Traumatic injury           | OA: 22<br>Control: 16  | 41<br>25 | 59<br>21                   | NR<br>NR | [123] |
| Jacquet (2018)      | France    | Knee     | Meniscus                             | TKR                                      | No                         | OA: 5                  | 40       | 64                         | 23.2     | [58]  |
| Jacquet (2019)      | France    | Knee     | Meniscus (lateral)                   | Advanced medially, KL grade <2 laterally | No                         | OA: 24                 | 50       | 64                         | NR       | [59]  |

|                    |         |      |                                                     |                                       |                                   |                                   |           |                             |              |       |
|--------------------|---------|------|-----------------------------------------------------|---------------------------------------|-----------------------------------|-----------------------------------|-----------|-----------------------------|--------------|-------|
| Johnson (2001)     | USA     | Knee | Meniscus (medial)                                   | Advanced (joint replacement)          | Cadavers                          | OA: 5<br>Control: 5               | NR<br>NR  | NR<br>NR                    | NR<br>NR     | [60]  |
| Karjalainen (2021) | Finland | Knee | Meniscus (medial & lateral)                         | Outerbridge IV medially; 0/I medially | Cadavers                          | OA: 10<br>Control: 10             | 50<br>50  | 63 ± 7<br>51 ± 17           | NR           | [61]  |
| Karube (1981)      | Japan   | Knee | Meniscus                                            | NR                                    | NR                                | OA: 3<br>Control: 17 <sup>#</sup> | NR        | 48-62<br>13-62 <sup>#</sup> | NR<br>NR     | [62]  |
| Katsuragawa (2010) | Japan   | Knee | Meniscus (ant. horn and body of medial and lateral) | End-stage                             | Cadavers w/o joint disease        | OA: 40<br>Control: 22             | NR<br>NR  | NR<br>84 (73-92)            | NR<br>NR     | [63]  |
| Kaufmann (2003)    | Germany | Knee | Synovium                                            | Knee replacement                      | No                                | OA: 21                            | 76        | 71 (49-82)                  | NR           | [98]  |
| Kiraly (2017)      | USA     | Knee | Meniscus (posterior medial)                         | TKR                                   | No                                | OA: 10                            | NR        | NR                          | NR           | [64]  |
| Klareskog (1986)   | Sweden  | NR   | Synovium                                            | Arthroplasty                          | No                                | OA: 15                            | NR        | NR                          | NR           | [124] |
| Kodama (2018)      | Japan   | Knee | Meniscus (ant. & post. sections)                    | KL grade 4 (TKR)                      | No                                | OA: 26 menisci                    | 84        | 76 ± 6.7 (68-84)            | NR           | [65]  |
| Komro (2020)       | USA     | Knee | Ligament (ACL)                                      | OCS mean 3.6 (range 3.2-4.0)          | Cadaver (normal macroscopic ACL)  | OA: 6<br>Control: 16              | 100<br>50 | 66 ± 9.6<br>75 ± 12.3       | 37.6<br>23.0 | [36]  |
| Konttinen (1999)   | Finland | Hip  | Synovium                                            | NR                                    | ACL tear (2), meniscal injury (3) | OA: 10<br>Control: 5              | 70<br>60  | 71 (41-84)<br>41 (22-53)    | NR<br>NR     | [109] |
| Konttinen (2001)   | Finland | Hip  | Synovium                                            | THA                                   | No                                | OA: 10                            | 60        | 70 (40-83)                  | NR           | [110] |
| Kragstrup (2019)   | USA     | Knee | Synovium                                            | KL grade 2-4                          | No                                | OA: 12                            | NR        | NR                          | NR           | [99]  |
| Kriegsman (2004)   | Germany | NR   | Synovium                                            | NR                                    | No                                | OA: 3                             | NR        | NR                          | NR           | [125] |
| Kumagai (2012)     | USA     | Knee | Ligament (ACL & PCL)                                | Koshimoto's grade 3-5                 | No                                | OA: 28                            | 82        | 77 (67-84)                  | NR           | [37]  |

|                          |           |            |                                    |                    |                                 |                               |          |                                  |            |       |
|--------------------------|-----------|------------|------------------------------------|--------------------|---------------------------------|-------------------------------|----------|----------------------------------|------------|-------|
| Kwok (2014)              | USA       | Knee       | Meniscus                           | OARSI score 4      | Healthy donors (OARSI 0-1)      | OA: 3<br>Control: 3           | NR<br>NR | 75 (61-90)<br>31 (20-41)         | NR<br>NR   | [66]  |
| Levy (2013)              | USA       | Knee       | Ligament (ACL & PCL)               | OCS score 0-4      | Cadavers w/o joint degeneration | 65 (111 OA & 9 control knees) | 54       | 67 ± 19 (23-92)                  | 24.8       | [38]  |
| Li (2000)                | Finland   | Hip        | Synovium                           | Hip replacement    | No                              | OA: 10                        | NR       | NR                               | NR         | [111] |
| Lopez-Franco (2016)      | Spain     | Knee       | Meniscus (medial)                  | Knee replacement   | No                              | OA: 31                        | 74       | 72 ± 6.7 (60-84)                 | NR         | [67]  |
| Mapp (1985)              | UK        | Knee & hip | Synovium                           | NR                 | No                              | OA: 4                         | 100      | 60.8 (46-69)                     | NR         | [113] |
| Marczak (2017)           | Poland    | Knee       | Ligament (PCL)                     | Ahlbäck grade 3-5  | Cadavers w/o joint damage       | OA: 50<br>Control: 10         | 80<br>70 | 71 (53-84)<br>72 (67-78)         | NR<br>NR   | [39]  |
| Martins (2018)           | Brazil    | Knee       | Ligament (PCL)                     | Ahlbäck grade 1-5  | No                              | OA: 85                        | 81       | 70 (53-87)                       | NR         | [40]  |
| Masuda (1991)            | Japan     | Knee       | Synovium, meniscus                 | NR                 | No                              | OA: 10                        | NR       | 76                               | NR         | [68]  |
| Mattiello-Sverzut (2013) | Brazil    | Knee       | Skeletal muscle (vastus lateralis) | KL grade 2.3 ± 1.2 | No                              | OA: 6                         | 33       | 62 ± 5                           | 28.1       | [89]  |
| Mazzocca (2013)          | USA       | Shoulder   | Tendon (long head of biceps)       | NR                 | Cadavers w/o joint damage       | OA: 9<br>Control: 9           | 22<br>56 | 59 ± 11.6<br>58 ± 14.7           | NR<br>NR   | [134] |
| McDaniel (2017)          | USA       | Knee       | Meniscus (medial & lateral)        | Knee replacement   | Cadavers w/o joint damage       | OA: 14<br>Control: 14         | 50<br>64 | 62 ± 7.7<br>67 ± 10.6            | 34.6<br>NR | [69]  |
| Meknas (2012)            | Norway    | Hip Tendon | Tendon (internal obturator)        | NR                 | Femoral fracture                | OA: 10<br>Control: 10         | 60<br>80 | Med 60 (48-75)<br>Med 83 (60-90) | NR<br>NR   | [135] |
| Melrose (2008)           | Australia | Knee       | Meniscus (medial & lateral)        | Joint replacement  | Cadavers w/o cartilage damage   | OA: 17<br>Control: 6          | 11<br>NR | 77.8 ± 5.4 (70-88) (60-75)       | NR<br>NR   | [70]  |
| Mine (2013)              | Japan     | Knee       | Meniscus                           | TKR                | No                              | OA: 12                        | NR       | NR                               | NR         | [71]  |

|                  |             |       |                                                 |                      |                                                   |                                  |                     |                                      |                |       |
|------------------|-------------|-------|-------------------------------------------------|----------------------|---------------------------------------------------|----------------------------------|---------------------|--------------------------------------|----------------|-------|
| Mobargha (2014)  | Sweden      | Thumb | Ligament (volar anterior oblique & dorsoradial) | Eaton stage 2-3      | No                                                | OA: 11                           | 91                  | 67 (51-83)                           | NR             | [46]  |
| Monibi (2021)    | USA         | Knee  | Meniscus (posterior medial)                     | Knee replacement     | No                                                | OA: 8                            | 63                  | 65 ± 5.5                             | NR             | [72]  |
| Musumeci (2014)  | Italy       | Knee  | Meniscus (medial & lateral)                     | KL grade 2-3         | ACL reconstruction                                | OA: 40<br>Control: 9             | 38<br>44            | Med 68 (51-76)<br>Med 60 (45-66)     | NR<br>NR       | [73]  |
| Nagata (2000)    | Japan       | Knee  | Meniscus (medial)                               | KCS score: mean 52.6 | No                                                | OA: 11                           | 73                  | 79 (73-86)                           | NR             | [74]  |
| Nakahara (2013)  | USA         | Knee  | Ligament (ACL)                                  | KCS score 2-4        | Normal cadaver, aged controls (cartilage score 1) | OA: 16<br>Cadaver: 13<br>Aged: 8 | 50<br>Unclear<br>63 | 80 ± 11.4<br>37 ± 11.0<br>77 ± 12.9  | NR<br>NR<br>NR | [41]  |
| Nakashima (1998) | Japan       | Knee  | Synovium                                        | KCS score (2-4)      | No                                                | OA: 9                            | 67                  | 57 ± 8 (47-70)                       | NR             | [100] |
| Nelissen (2001)  | Netherlands | Knee  | Ligament (PCL)                                  | Ahlbäck grade 3-5    | No                                                | OA: 11                           | 82                  | 75 (60-85)                           | NR             | [42]  |
| Nikkari (1995)   | Finland     | Knee  | Synovium                                        | Knee replacement     | No                                                | OA: 6                            | NR                  | 63                                   | NR             | [101] |
| Nishida (1995)   | Japan       | Knee  | Synovium                                        | Knee replacement     | No                                                | OA: 18                           | 83                  | 72 (62-86)                           | NR             | [102] |
| Noehren (2018)   | USA         | Knee  | Skeletal muscle (vastus lateralis)              | KL grade 2-3         | KL grade 0-1                                      | OA: 24<br>Control: 15            | 42<br>67            | 60 ± 5.5 (52-73)<br>64 ± 6.9 (54-74) | 28.4<br>26.9   | [90]  |
| Okamoto (2015)   | Japan       | TMJ   | Synovium                                        | NR                   | Cancer patient cadavers                           | OA: 5<br>Control: 3              | 60<br>67            | 60 (20-72)<br>64 (61-70)             | NR<br>NR       | [120] |
| Park (2015)      | South Korea | Knee  | Meniscus (medial posterior root)                | KL grade 3-4         | Normal joint cadavers                             | OA: 99<br>Control: 3             | NR<br>33            | (50-85)<br>54 (47-61)                | NR<br>NR       | [75]  |

|                  |                |            |                             |                    |                              |                       |          |                          |              |       |
|------------------|----------------|------------|-----------------------------|--------------------|------------------------------|-----------------------|----------|--------------------------|--------------|-------|
| Park (2021)      | South Korea    | Knee       | Meniscus (medial & lateral) | Knee replacement   | No                           | OA: 12                | 100      | 73 (65-82)               | NR           | [76]  |
| Poduval (2010)   | Finland        | NR         | Synovium                    | NR                 | Knee trauma                  | OA: 5<br>Control: 5   | NR<br>NR | NR<br>NR                 | NR<br>NR     | [126] |
| Pollock (1990)   | UK             | Knee & hip | Synovium                    | NR                 | Trauma                       | OA: 7<br>Control: 4   | 71<br>50 | 69 (58-83)<br>38 (27-60) | NR<br>NR     | [114] |
| Pordzik (2020)   | Germany        | Knee       | Meniscus (medial & lateral) | KL grade 4         | NR                           | OA: 26<br>Control: 14 | 73<br>NR | Overall: 72 ± 6.7        | NR           | [77]  |
| Rafael (2014)    | Portugal       | Knee       | Synovium                    | Knee replacement   | Normal joint cadaver         | OA: NR<br>Control: NR | NR<br>NR | NR<br>NR                 | NR<br>NR     | [103] |
| Rajgopal (2014)  | India          | Knee       | Ligament (PCL)              | KCS mean 42        | No                           | OA: 62                | 74       | 67 ± 11 (49-91)          | NR           | [43]  |
| Richardot (2009) | France         | Knee       | Synovium                    | Ahlbäck grade 3-5  | No                           | OA: 4                 | 100      | (54-73)                  | NR           | [104] |
| Rinaldi (1998)   | Germany        | Knee & hip | Synovium                    | NR                 | No                           | OA: 18                | NR       | NR                       | NR           | [115] |
| Roller (2015)    | USA            | Knee       | Meniscus (medial & lateral) | KL grade mean 3.94 | Cadaver or amputation (KL 0) | OA: 23<br>Control: 5  | NR<br>NR | 60 (36-81)<br>77 (64-87) | NR<br>NR     | [78]  |
| Roller (2015)    | USA            | Knee       | Meniscus                    | Mild to severe OA  | Normal joint cadaver         | OA: 6<br>Control: 3   | 50<br>NR | (44-69)<br>(64-78)       | NR<br>NR     | [79]  |
| Saito (2002)     | Japan          | Knee       | Synovium (medial & lateral) | Advanced disease   | No                           | OA: 21                | NR       | 64 (47-78)               | NR           | [105] |
| Santiago (2006)  | Spain & France | NR         | Synovium                    | NR                 | No                           | OA: 8                 | NR       | NR                       | NR           | [127] |
| Schneider (1994) | Germany        | NR         | Synovium                    | NR                 | Meniscal lesions             | OA: 8<br>Control: 31  | NR<br>NR | NR<br>NR                 | NR<br>NR     | [128] |
| Scott (1984)     | UK             | NR         | Synovium                    | NR                 | Meniscal lesions             | OA: 10                | 60       | (37-72)                  | NR           | [129] |
| Scott (1981)     | UK             | Hip & knee | Synovium                    | NR                 | No                           | OA: 8                 | 63       | 61 (37-72)               | NR           | [116] |
| Serrao (2014)    | Brazil         | Knee       | Skeletal muscle             | KL grade 1-2       | Healthy controls             | OA: 18<br>Control: 17 | NR<br>NR | 51 ± 6.3<br>52 ± 8.1     | 29.5<br>27.3 | [91]  |



|                      |                      |            |                                 |                          |                       |                      |             |                  |          |       |
|----------------------|----------------------|------------|---------------------------------|--------------------------|-----------------------|----------------------|-------------|------------------|----------|-------|
|                      |                      |            | (vastus lateralis)              |                          |                       |                      |             |                  |          |       |
| Sladojevic (2016)    | Bosnia & Herzegovina | Knee       | Meniscus (medial & lateral)     | Advanced disease         | No                    | OA: 35               | 86          | 69.3 (56-78)     | 30.8     | [80]  |
| Son (2013)           | USA                  | Knee       | Meniscus (medial & lateral)     | TKR                      | No                    | OA: 14               | 57          | 65               | NR       | [81]  |
| Sun (2010)           | USA                  | Knee       | Meniscus (posterior medial)     | End-stage disease        | No                    | OA: 8                | 6           | 57 (42-70)       | NR       | [82]  |
| Sun (2012)           | USA                  | Knee       | Meniscus (medial)               | End-stage disease        | No                    | OA: 8                | 6           | 57 (42-70)       | NR       | [83]  |
| Takahashi (1996)     | Japan                | Knee       | Synovium                        | TKR                      | No                    | OA: 10               | NR          | 58-79            | NR       | [106] |
| Takahashi (1998)     | Japan                | Knee       | Meniscus (central & peripheral) | TKR                      | No                    | OA: 21               | NR          | 69 (40-84)       | NR       | [84]  |
| Turdean (2017)       | Romania              | Hip        | Synovium                        | KL grade 3-4             | No                    | OA: 57               | 44          | 64 (24-83)       | NR       | [112] |
| Van Linthoudt (1997) | USA                  | Hip & knee | Synovium                        | KL grade 2-4, mean 3.25  | No                    | OA: 16               | 0           | 68 (54-76)       | NR       | [117] |
| Wang (2020)          | UK                   | Knee       | Meniscus (medial)               | TKR                      | No                    | OA: 10               | 40          | 66 (46-87)       | NR       | [85]  |
| Wang (2018)          | China                | Knee       | Synovium                        | TKR                      | Lower limb amputation | OA: 31<br>Control: 5 | Overall: 20 | Overall: (48-69) | NR       | [107] |
| Warnecke (2020)      | Germany              | Knee       | Meniscus (lateral)              | TKR                      | No                    | OA: 24               | 67          | 67 ± 9.0         | 29       | [86]  |
| Worrall (1991)       | UK                   | NR         | Synovium                        | TKR                      | Malignancy            | OA: 8<br>Control: 5  | 63<br>NR    | 62<br>NR         | NR<br>NR | [130] |
| Worrall (1994)       | UK                   | Knee & hip | Synovium                        | Replacement arthroplasty | (ankle, knee, elbow)  | OA: 6<br>Control: 6  | NR<br>NR    | NR<br>NR         | NR<br>NR | [118] |
| Zhang (2012)         | USA                  | Knee       | Meniscus                        | NR                       | No                    | OA: 18               | NR          | (50-81)          | NR       | [87]  |
| Zhu (2017)           | China                | Knee       | Ligament (ACL)                  | TKR                      | No                    | OA: 20               | NR          | 65 ± 5.6         | NR       | [44]  |

**Supplementary Table 2.** Study characteristics of animal studies. Joint of interest is the knee joint, unless otherwise specified. Age/time is reported in days (d), weeks (w), months (m), or years (y).

**Abbreviations:** ACL = anterior cruciate ligament, ACLT = anterior cruciate ligament transection, DJD = degenerative joint disease, DMM = destabilisation of the medial meniscus, LCL = lateral cruciate ligament, MCL = medial cruciate ligament, MIA = monoiodoacetate, NR = not reported, NZW = New Zealand White, OARSI = osteoarthritis research society international, PCL = posterior cruciate ligament.

\* = Lee *et al.* (2020): 11 animals (5 male and 4 female) were used across three groups: 2 OA groups and 1 control group.

| Study (year)              | Country      | Species (strain)      | OA model                | Tissue (details)         | Stage of disease / OA severity | Control population | No. of animals                                    | Female (%) | Age at start of study (w/m/y) | Follow-up | Ref   |
|---------------------------|--------------|-----------------------|-------------------------|--------------------------|--------------------------------|--------------------|---------------------------------------------------|------------|-------------------------------|-----------|-------|
| Almasry (2015)            | Saudi Arabia | Rat (Wistar albino)   | Meniscectomy            | Synovium                 | Early stage                    | Non-operated       | OA: 15<br>Control: 15                             | 0<br>0     | Adult                         | 6w        | [154] |
| Anderson-Mackenzie (1999) | UK           | Mouse (CBA, STR/ort)  | STR/ort                 | Ligament (ACL & PCL)     | NR                             | CBA mice           | OA: 16<br>Control: NR                             | 0<br>0     | 22/30/40/50w<br>22/30/40/50w  | 0w        | [137] |
| Bansal (2020)             | USA          | Pig (Yucutan minipig) | DMM                     | Meniscus                 | NR                             | Sham surgery       | OA: 13<br>Control: 11                             | 0<br>0     | 6.8m<br>6.8m                  | 1 & 3m    | [152] |
| Barton (2021)             | Canada       | Sheep (Suffolk cross) | Partial ACL transection | Ligament (PCL), synovium | NR                             | Non-operated       | OA: 11<br>Control: 6                              | 100<br>100 | 3-5y<br>3-5y                  | 20 & 40 w | [141] |
| Bedingfield (2021)        | USA          | Mouse (C57BL/6)       | Mechanical loading      | Meniscus, synovium       | DJD score 5                    | Non-loaded         | NR<br>NR                                          | NR<br>NR   | 6m<br>6m                      | NR<br>NR  | [143] |
| Bryk (2021)               | Poland       | Rat (Wistar)          | MIA                     | Synovium                 | NR                             | Non-injected       | OA: 5-8 per time period<br>Control: 1-2 per group | 0<br>0     | NR<br>NR                      | 2-28d     | [155] |
| Castrogiovanni (2019)     | Italy        | Rat (Wistar)          | ACLT                    | Synovium                 | OARSI score                    | NR                 | OA: 8<br>Control: 8                               | 0<br>0     | Adult<br>Adult                | 14w       | [156] |

|                                  |        |                               |                          |                                                |                                  |              |                                |            |              |                 |       |  |
|----------------------------------|--------|-------------------------------|--------------------------|------------------------------------------------|----------------------------------|--------------|--------------------------------|------------|--------------|-----------------|-------|--|
|                                  |        |                               |                          |                                                | 3.25 ±<br>0.71                   |              |                                |            |              |                 |       |  |
| Dai (2020)                       | China  | Rat<br>(Sprague-<br>Dawley)   | ACLT                     | Synovium<br>(ant. &<br>post.)                  | Early to<br>late-<br>stage<br>OA | Sham surgery | OA: 36<br>Control: 36          | 0<br>0     | 12w<br>12w   | 4, 8 &<br>12w   | [157] |  |
| Endo (2018)                      | Japan  | Rat<br>(Wistar)               | ACLT                     | Meniscus<br>(medial &<br>lateral)              | OARSI<br>score 1                 | Sham surgery | OA: 12<br>Control: 12          | 0<br>0     | 10w<br>10w   | 3w              | [151] |  |
| Funakoshi<br>(2007)              | Canada | Sheep<br>(Suffolk<br>cross)   | ACL + MCL<br>transection | Ligament<br>(ACL &<br>PCL)                     | NR                               | Non-operated | OA: 5<br>Control: 4            | 100<br>100 | 3y<br>3y     | 20w             | [142] |  |
| Gamal (2019)                     | Egypt  | Rat (albino)                  | Cartilage defect         | Synovium                                       | NR                               | Non-operated | OA: 10<br>Control: 10          | 0<br>0     | 4-5m<br>4-5m | 4 & 6w          | [158] |  |
| Hellio Le<br>Graverand<br>(2001) | France | Rabbit<br>(NZW)               | ACLT                     | Meniscus<br>(medial &<br>lateral)              | NR                               | Non-operated | OA: 24<br>Control: 12          | 100<br>100 | 12m<br>12m   | 3 & 8w          | [146] |  |
| Hellio Le<br>Graverand<br>(2001) | Canada | Rabbit<br>(NZW)               | ACLT                     | Meniscus<br>(medial)                           | NR                               | Non-operated | OA: 16<br>Control: 16          | 100<br>100 | 12m<br>12m   | 1, 2, 3,<br>4w  | [147] |  |
| Lapadula (1995)                  | Italy  | Rabbit<br>(Flanders<br>giant) | Vitamin A<br>injection   | Synovium                                       | Early<br>stage                   | Untreated    | OA: 12<br>Control: 4           | 0<br>0     | 8m<br>8m     | 3, 6, 9d        | [164] |  |
| Lee (2020)                       | USA    | Mouse<br>(BALB/cByJ)          | DMM                      | Meniscus                                       | NR                               | Sham surgery | OA: unclear*<br>Ctrl: unclear* | *<br>*     | 12w<br>12w   | 5w              | [144] |  |
| Levillain (2017)                 | France | Rabbit<br>(NZW)               | ACLT                     | Meniscus<br>(medial)                           | Early<br>stage                   | Non-operated | OA: 6<br>Control: 6            | 0<br>0     | 6m<br>6m     | 8w              | [149] |  |
| Levillain (2017)                 | France | Rabbit<br>(NZW)               | ACLT                     | Meniscus<br>(medial)                           | Early<br>stage                   | Non-operated | OA: 6<br>Control: 6            | 0<br>0     | 6m<br>6m     | 8w              | [148] |  |
| Li (2020)                        | China  | Rat<br>(Sprague-<br>Dawley)   | MIA                      | Synovium                                       | NR                               | Sham surgery | OA: 6<br>Control: 6            | 0<br>0     | 8w<br>8w     | 8w              | [159] |  |
| Loeser (2013)                    | USA    | Mouse<br>(C57BL/6)            | DMM                      | Meniscus,<br>ligament,<br>capsule,<br>synovium | Early to<br>end-<br>stage        | Sham surgery | OA: 36<br>Control: 36          | 0<br>0     | 12w<br>12w   | 2, 4, 8,<br>16w | [136] |  |

|                       |         |                                |                           |                                                     |                                              |                  |                         |            |                        |                   |       |
|-----------------------|---------|--------------------------------|---------------------------|-----------------------------------------------------|----------------------------------------------|------------------|-------------------------|------------|------------------------|-------------------|-------|
| McErlain (2008)       | Canada  | Rat<br>(Sprague-Dawley)        | ACLT                      | Tendon<br>(patellar)                                | NR                                           | Sham surgery     | OA: 15<br>Control: 3    | 0<br>0     | 3w<br>3w               | 1, 2, 3,<br>4, 5m | [166] |
| Miller (2014)         | Canada  | Rabbit<br>(NZW)                | ACLT                      | Ligament<br>(MCL)                                   | NR                                           | Non-operated     | OA: 6<br>Control: 6     | 100<br>100 | 1y<br>1y               | 6w                | [140] |
| Muschter (2020)       | Germany | Mouse<br>(C57BL/6)             | DMM                       | Meniscus                                            | NR                                           | Sham surgery     | OA: 72<br>Control: 72   | 0<br>0     | 8-10w<br>8-10w         | 2, 4, 8,<br>12w   | [145] |
| Ramos-Mucci<br>(2020) | UK      | Mouse<br>(CBA,<br>STR/ort)     | STR/ort                   | Meniscus,<br>ligaments<br>(ACL,<br>MCL, LCL)        | OARSI<br>grade<br>1-6                        | CBA mice         | OA: 29<br>Control: 12   | 0<br>0     | 27, 37, 40w<br>26, 40w | N/A               | [138] |
| Shi (2020)            | China   | Rabbit<br>(NZW)                | Adapted Videman<br>method | Skeletal<br>muscle<br>(rec. fem<br>& biceps<br>fem) | NR                                           | Non-operated     | OA: 6<br>Control: 6     | 0<br>0     | NR<br>NR               | 10w               | [153] |
| Walton (1977)         | UK      | Mouse<br>(CBA,<br>STR/ort)     | STR/ort                   | Ligament                                            | NR                                           | CBA mice         | OA: 351<br>Control: 348 | 36<br>28   | 4+m<br>4+m             | NR<br>NR          | [139] |
| Wei (2021)            | China   | Rabbit<br>(domestic)           | Modified Hulth<br>method  | Synovium                                            | OARSI<br>score<br>~5 (4w)<br>to ~11<br>(12w) | Sham surgery     | OA: 15<br>Control: 5    | NR<br>NR   | 6m<br>6m               | 4, 12w            | [165] |
| Zhang (2021)          | China   | Rabbit<br>(Sprague-<br>Dawley) | ACLT, DMM, MIA            | Synovium                                            | NR                                           | 'Normal'         | Total: 80               | 0          | NR                     | 2, 4w             | [161] |
| Zhang (2021)          | China   | Rabbit<br>(Sprague-<br>Dawley) | MIA                       | Synovium                                            | NR                                           | 'Normal'         | OA: 8<br>Control: 8     | 0<br>0     | 2m<br>2m               | 5w                | [160] |
| Zhang (2019)          | China   | Rabbit<br>(Sprague-<br>Dawley) | MIA                       | Synovium                                            | NR                                           | Saline injection | OA: 6<br>Control: 6     | 100<br>100 | 3m<br>3m               | 4w                | [163] |
| Zhang (2019)          | China   | Rabbit<br>(Sprague-<br>Dawley) | ACLT                      | Synovium                                            | NR                                           | 'Normal'         | OA: 8<br>Control: 8     | 0<br>0     | 3m<br>3m               | 4w                | [162] |

|             |       |                     |                  |                        |    |              |                       |            |            |      |       |
|-------------|-------|---------------------|------------------|------------------------|----|--------------|-----------------------|------------|------------|------|-------|
| Zhao (2014) | China | Rabbit<br>(Chinese) | Cartilage injury | Meniscus<br>(interior) | NR | Sham surgery | OA: 12<br>Control: 12 | 100<br>100 | 20m<br>20m | 1-6w | [150] |
|-------------|-------|---------------------|------------------|------------------------|----|--------------|-----------------------|------------|------------|------|-------|

**Supplementary Table 3.** 2015 OHAT risk of bias analysis of all included studies. Bias in each category is rated according to the following 4-point scale: ++, definitely low risk of bias; +, probably low risk of bias; -, probably high risk of bias; --, definitely high risk of bias. Questions 1-6 only apply to certain study types. Of note, several studies on human OA did not recruit a healthy control group, but instead performed subgroup analysis of a single cohort. In these cases, confounding bias was assessed in question 11.

Abbreviations: A/EB = attrition/exclusion bias, CB = confounding bias, DB = detection bias, N/A = not applicable, OB = other bias, PB = performance bias, SB = selection bias, SRB = selective reporting bias.

| Domains                   | SB  |     |     | CB  | PB  |     | A/E<br>B | DB |    | SRB | OB |
|---------------------------|-----|-----|-----|-----|-----|-----|----------|----|----|-----|----|
|                           | 1   | 2   | 3   | 4   | 5   | 6   | 7        | 8  | 9  | 10  | 11 |
| Abdul Sahib (2017)        | N/A | N/A | -   | -   | N/A | N/A | +        | -  | -- | -   | ++ |
| Abraham (2014)            | N/A | N/A | -   | -   | N/A | N/A | ++       | -  | +  | ++  | ++ |
| Akisue (2002)             | N/A | N/A | -   | -   | N/A | N/A | ++       | ++ | +  | ++  | ++ |
| Allain (2001)             | N/A | N/A | N/A | N/A | N/A | N/A | ++       | -  | -  | ++  | -  |
| Almasry (2015)            | +   | -   | N/A | N/A | --  | -   | -        | ++ | +  | ++  | ++ |
| Anderson-Mackenzie (1999) | N/A | N/A | ++  | ++  | N/A | N/A | -        | ++ | +  | ++  | ++ |
| Bansal (2020)             | -   | -   | N/A | N/A | +   | -   | -        | ++ | ++ | ++  | ++ |
| Barton (2021)             | -   | -   | N/A | N/A | -   | -   | -        | +  | ++ | +   | ++ |
| Battistelli (2019)        | N/A | N/A | -   | -   | N/A | N/A | -        | ++ | -  | --  | -- |
| Bedingfield (2021)        | --  | --  | N/A | N/A | --  | --  | -        | ++ | +  | ++  | ++ |
| Belluzzi (2020)           | N/A | N/A | ++  | ++  | N/A | N/A | -        | -  | +  | ++  | ++ |
| Bryk (2021)               | -   | -   | N/A | N/A | -   | -   | -        | +  | +  | -   | ++ |
| Cameron (1973)            | N/A | N/A | -   | -   | N/A | N/A | +        | -  | -  | -   | -  |
| Campbell (2015)           | N/A | N/A | ++  | ++  | N/A | N/A | -        | ++ | +  | ++  | ++ |
| Castrogiovanni (2019)     | -   | -   | N/A | N/A | -   | -   | -        | ++ | ++ | ++  | ++ |
| Chang (2005)              | N/A | N/A | -   | -   | N/A | N/A | -        | -  | +  | ++  | ++ |
| Cheng (1996)              | N/A | N/A | --  | ++  | N/A | N/A | ++       | ++ | ++ | ++  | ++ |
| Christensen (2019)        | N/A | N/A | --  | --  | N/A | N/A | +        | +  | -  | ++  | ++ |
| Cillero-Pastor (2015)     | N/A | N/A | -   | -   | N/A | N/A | +        | -  | +  | ++  | ++ |

|                                |     |     |     |     |     |     |    |    |    |    |    |
|--------------------------------|-----|-----|-----|-----|-----|-----|----|----|----|----|----|
| Cutolo (1992)                  | N/A | N/A | -   | -   | N/A | N/A | +  | ++ | -  | -  | -  |
| Dai (2020)                     | +   | -   | N/A | N/A | ++  | -   | +  | ++ | +  | ++ | ++ |
| Dessombz (2013)                | N/A | N/A | N/A | N/A | N/A | N/A | -- | ++ | +  | +  | ++ |
| DiCesare (1999)                | N/A | N/A | -   | -   | N/A | N/A | +  | -  | +  | +  | ++ |
| DiFrancesco (1995)             | N/A | N/A | +   | +   | N/A | N/A | ++ | -  | -  | -  | +  |
| Dijkgraaf (1997)               | N/A | N/A | -   | +   | N/A | N/A | -  | ++ | -  | ++ | -  |
| Doerschuk (1999)               | N/A | N/A | -   | -   | N/A | N/A | -  | ++ | -  | +  | ++ |
| Ea (2013)                      | N/A | N/A | -   | -   | N/A | N/A | +  | ++ | ++ | ++ | -  |
| Endo (2018)                    | +   | -   | N/A | N/A | +   | -   | -  | ++ | -  | +  | ++ |
| Ene (2015)                     | N/A | N/A | -   | -   | N/A | N/A | +  | +  | -  | -- | ++ |
| Exposito Molinero (2016)       | N/A | N/A | +   | +   | N/A | N/A | +  | -  | +  | ++ | ++ |
| Fan (2012)                     | N/A | N/A | +   | +   | N/A | N/A | ++ | ++ | -  | -  | ++ |
| Fink (2007)                    | N/A | N/A | N/A | N/A | N/A | N/A | +  | ++ | -  | ++ | ++ |
| Fischenich (2015)              | N/A | N/A | -   | -   | N/A | N/A | -  | -  | ++ | ++ | ++ |
| Folkesson (2020)               | N/A | N/A | ++  | ++  | N/A | N/A | ++ | ++ | +  | ++ | ++ |
| Fuhrmann (2015)                | N/A | N/A | +   | +   | N/A | N/A | ++ | -  | ++ | ++ | -  |
| Funakoshi (2007)               | -   | -   | N/A | N/A | -   | -   | +  | ++ | +  | ++ | ++ |
| Gamal (2019)                   | -   | -   | N/A | N/A | -   | -   | +  | +  | -  | ++ | ++ |
| Ghosh (1975)                   | N/A | N/A | -   | -   | N/A | N/A | -  | +  | +  | -  | ++ |
| Grevenstein (2020)             | N/A | N/A | -   | -   | N/A | N/A | ++ | -  | -  | ++ | ++ |
| Haut Donahue (2021)            | N/A | N/A | ++  | ++  | N/A | N/A | +  | -  | +  | ++ | ++ |
| Heinegård (1968)               | N/A | N/A | -   | -   | N/A | N/A | ++ | +  | +  | ++ | -- |
| LeGraverand (2001) (ref [146]) | -   | -   | N/A | N/A | -   | -   | -  | +  | +  | ++ | ++ |
| LeGraverand (2001) (ref [147]) | -   | -   | N/A | N/A | -   | -   | -  | +  | -  | ++ | ++ |
| Herbert (1973)                 | N/A | N/A | -   | -   | N/A | N/A | ++ | -  | +  | ++ | -- |
| Hino (1995)                    | N/A | N/A | -   | -   | N/A | N/A | +  | +  | -  | -- | +  |
| Hino (2020)                    | N/A | N/A | N/A | N/A | N/A | N/A | +  | -  | ++ | ++ | ++ |
| Ibrahim (2019)                 | N/A | N/A | ++  | ++  | N/A | N/A | +  | +  | +  | ++ | ++ |
| Ibrahim (2021)                 | N/A | N/A | +   | +   | N/A | N/A | -  | -  | ++ | ++ | ++ |
| Ishizuka (2016)                | N/A | N/A | --  | --  | N/A | N/A | -- | ++ | -  | ++ | -  |
| Itokazu (1998)                 | N/A | N/A | -   | -   | N/A | N/A | ++ | -  | -- | ++ | -- |
| Jacquet (2018)                 | N/A | N/A | N/A | N/A | N/A | N/A | +  | ++ | ++ | ++ | ++ |
| Jacquet (2019)                 | N/A | N/A | N/A | N/A | N/A | N/A | +  | ++ | +  | ++ | ++ |
| Johnson (2001)                 | N/A | N/A | -   | -   | N/A | N/A | -  | -  | -  | ++ | -  |
| Karjalainen (2021)             | N/A | N/A | --  | ++  | N/A | N/A | ++ | ++ | +  | ++ | ++ |

|                              |     |     |     |     |     |     |    |    |    |    |    |
|------------------------------|-----|-----|-----|-----|-----|-----|----|----|----|----|----|
| Karube (1981)                | N/A | N/A | -   | -   | N/A | N/A | ++ | -  | +  | ++ | -  |
| Katsuragawa (2010)           | N/A | N/A | +   | +   | N/A | N/A | -  | ++ | -  | ++ | ++ |
| Kaufmann (2003)              | N/A | N/A | --  | --  | N/A | N/A | ++ | +  | +  | ++ | -- |
| Kiraly (2017)                | N/A | N/A | N/A | N/A | N/A | N/A | +  | -  | -  | -  | ++ |
| Klareskog (1986)             | N/A | N/A | -   | -   | N/A | N/A | +  | -  | -  | -  | ++ |
| Kodama (2018)                | N/A | N/A | N/A | N/A | N/A | N/A | -- | ++ | -  | ++ | ++ |
| Komro (2020)                 | N/A | N/A | --  | --  | N/A | N/A | +  | ++ | +  | ++ | +  |
| Konttinen (1999)             | N/A | N/A | -   | -   | N/A | N/A | ++ | -  | -  | ++ | -  |
| Konttinen (2001)             | N/A | N/A | +   | +   | N/A | N/A | -  | -  | +  | ++ | ++ |
| Kragstrup (2019)             | N/A | N/A | N/A | N/A | N/A | N/A | +  | ++ | +  | ++ | ++ |
| Kriegsmann (2004)            | N/A | N/A | -   | -   | N/A | N/A | +  | -  | +  | -  | -  |
| Kumagai (2012)               | N/A | N/A | N/A | N/A | N/A | N/A | +  | ++ | +  | ++ | -  |
| Kwok (2014)                  | N/A | N/A | -   | -   | N/A | N/A | ++ | ++ | -  | ++ | -  |
| Lapadula (1995)              | +   | -   | N/A | N/A | -   | -   | +  | -  | -  | -  | -- |
| Lee (2020)                   | -   | -   | N/A | N/A | -   | -   | -  | +  | -  | -  | ++ |
| Levillain (2017) (ref [149]) | -   | -   | N/A | N/A | -   | -   | ++ | ++ | -  | ++ | ++ |
| Levillain (2017) (ref [148]) | +   | -   | N/A | N/A | -   | -   | -  | ++ | -  | ++ | ++ |
| Levy (2013)                  | N/A | N/A | N/A | N/A | N/A | N/A | -  | +  | ++ | ++ | -  |
| Li (2000)                    | N/A | N/A | -   | -   | N/A | N/A | +  | -  | -  | ++ | -  |
| Li (2020)                    | +   | -   | N/A | N/A | +   | -   | -  | +  | +  | ++ | ++ |
| Loeser (2013)                | +   | -   | N/A | N/A | ++  | -   | +  | ++ | +  | ++ | ++ |
| Lopez-Franco (2016)          | N/A | N/A | -   | -   | N/A | N/A | ++ | +  | ++ | ++ | ++ |
| Mapp (1985)                  | N/A | N/A | -   | -   | N/A | N/A | +  | -  | +  | ++ | -  |
| Marczak (2017)               | N/A | N/A | ++  | ++  | N/A | N/A | ++ | ++ | -  | ++ | ++ |
| Martins (2018)               | N/A | N/A | -   | -   | N/A | N/A | ++ | ++ | +  | ++ | ++ |
| Masuda (1991)                | N/A | N/A | +   | +   | N/A | N/A | +  | -- | -  | ++ | -  |
| Mattiello-Svetzut (2013)     | N/A | N/A | N/A | N/A | N/A | N/A | -- | ++ | ++ | ++ | ++ |
| Mazzocca (2013)              | N/A | N/A | +   | +   | N/A | N/A | -- | +  | ++ | ++ | ++ |
| McDaniel (2017)              | N/A | N/A | ++  | ++  | N/A | N/A | +  | ++ | -  | ++ | ++ |
| McErlain (2008)              | +   | -   | N/A | N/A | ++  | -   | ++ | ++ | -  | ++ | ++ |
| Meknas (2012)                | N/A | N/A | -   | -   | N/A | N/A | +  | -  | +  | ++ | ++ |
| Melrose (2008)               | N/A | N/A | ++  | ++  | N/A | N/A | -  | -  | -  | ++ | -  |
| Miller (2014)                | -   | ++  | N/A | N/A | ++  | ++  | ++ | -  | ++ | ++ | -- |
| Mine (2013)                  | N/A | N/A | -   | -   | N/A | N/A | -  | -  | -  | ++ | -  |
| Mobargha (2014)              | N/A | N/A | N/A | N/A | N/A | N/A | +  | ++ | -  | ++ | ++ |



|                          |     |     |     |     |     |     |    |    |    |    |    |
|--------------------------|-----|-----|-----|-----|-----|-----|----|----|----|----|----|
| Monibi (2021)            | N/A | N/A | -   | -   | N/A | N/A | -  | -  | ++ | +  | ++ |
| Muschter (2020)          | -   | -   | N/A | N/A | ++  | -   | -- | ++ | ++ | ++ | ++ |
| Musumeci (2014)          | N/A | N/A | +   | +   | N/A | N/A | +  | ++ | ++ | ++ | ++ |
| Nagata (2000)            | N/A | N/A | -   | -   | N/A | N/A | ++ | ++ | -  | ++ | -  |
| Nakahara (2013)          | N/A | N/A | +   | +   | N/A | N/A | -- | ++ | -  | -- | +  |
| Nakashima (1998)         | N/A | N/A | N/A | N/A | N/A | N/A | ++ | ++ | -  | ++ | ++ |
| Nelissen (2001)          | N/A | N/A | -   | -   | N/A | N/A | ++ | ++ | -  | ++ | -  |
| Nikkari (1995)           | N/A | N/A | -   | -   | N/A | N/A | ++ | -  | -  | ++ | -  |
| Nishida (1995)           | N/A | N/A | -   | -   | N/A | N/A | +  | -  | -  | ++ | -  |
| Noehren (2018)           | N/A | N/A | +   | +   | N/A | N/A | -  | ++ | ++ | ++ | ++ |
| Okamoto (2015)           | N/A | N/A | +   | +   | N/A | N/A | ++ | ++ | -  | ++ | -  |
| Park (2015)              | N/A | N/A | -   | -   | N/A | N/A | +  | ++ | ++ | ++ | ++ |
| Park (2021)              | N/A | N/A | N/A | N/A | N/A | N/A | ++ | -  | +  | ++ | ++ |
| Poduval (2010)           | N/A | N/A | -   | -   | N/A | N/A | -  | -  | -  | ++ | -  |
| Pollock (1990)           | N/A | N/A | -   | -   | N/A | N/A | +  | -  | -  | ++ | -  |
| Pordzik (2020)           | N/A | N/A | +   | +   | N/A | N/A | +  | ++ | +  | ++ | ++ |
| Rafael (2014)            | N/A | N/A | -   | -   | N/A | N/A | -  | -  | -  | ++ | -  |
| Rajgopal (2014)          | N/A | N/A | N/A | N/A | N/A | N/A | ++ | +  | +  | ++ | ++ |
| Ramos-Mucci (2020)       | N/A | N/A | ++  | ++  | N/A | N/A | -  | ++ | -  | -  | -  |
| Richardot (2009)         | N/A | N/A | -   | -   | N/A | N/A | ++ | ++ | -  | ++ | ++ |
| Rinaldi (1998)           | N/A | N/A | -   | -   | N/A | N/A | -  | ++ | +  | ++ | -  |
| Roller (2015) (ref [78]) | N/A | N/A | ++  | ++  | N/A | N/A | +  | ++ | +  | ++ | ++ |
| Roller (2015) (ref [79]) | N/A | N/A | -   | -   | N/A | N/A | -- | ++ | ++ | +  | -  |
| Saito (2002)             | N/A | N/A | N/A | N/A | N/A | N/A | -  | ++ | +  | ++ | ++ |
| Santiago (2006)          |     |     |     |     |     |     |    |    |    |    |    |
| Schneider (1994)         | N/A | N/A | -   | -   | N/A | N/A | +  | +  | -  | ++ | -  |
| Scott (1981)             | N/A | N/A | -   | -   | N/A | N/A | +  | -  | -  | ++ | -  |
| Scott (1984)             | N/A | N/A | -   | -   | N/A | N/A | ++ | -  | -  | ++ | -  |
| Serrão (2014)            | N/A | N/A | ++  | ++  | N/A | N/A | ++ | ++ | +  | ++ | -  |
| Shi (2020)               | +   | -   | N/A | N/A | +   | -   | -  | +  | +  | +  | ++ |
| Sladojevic (2016)        | N/A | N/A | -   | -   | N/A | N/A | +  | -  | +  | ++ | ++ |
| Son (2013)               | N/A | N/A | N/A | N/A | N/A | N/A | +  | -  | +  | ++ | ++ |
| Sun (2010)               | N/A | N/A | -   | -   | N/A | N/A | +  | -  | ++ | ++ | ++ |
| Sun (2012)               | N/A | N/A | -   | -   | N/A | N/A | ++ | -  | ++ | ++ | ++ |
| Takahashi (1996)         | N/A | N/A | -   | -   | N/A | N/A | +  | ++ | +  | ++ | ++ |
| Takahashi (1998)         | N/A | N/A | --  | ++  | N/A | N/A | +  | +  | +  | -  | ++ |

|                          |     |     |     |     |     |     |    |    |    |    |    |
|--------------------------|-----|-----|-----|-----|-----|-----|----|----|----|----|----|
| Turdean (2017)           | N/A | N/A | -   | -   | N/A | N/A | ++ | ++ | +  | -  | -- |
| Van Linthoudt (1997)     | N/A | N/A | N/A | N/A | N/A | N/A | ++ | ++ | +  | ++ | ++ |
| Walton (1977)            | N/A | N/A | -   | -   | N/A | N/A | -  | +  | -  | -  | +  |
| Wang (2018)              | N/A | N/A | -   | -   | N/A | N/A | +  | ++ | +  | ++ | ++ |
| Wang (2020)              | N/A | N/A | N/A | N/A | N/A | N/A | ++ | ++ | ++ | ++ | ++ |
| Warnecke (2020)          | N/A | N/A | -   | -   | N/A | N/A | -  | -  | +  | ++ | ++ |
| Wei (2021)               | +   | -   | N/A | N/A | -   | -   | +  | ++ | ++ | ++ | ++ |
| Worrall (1991)           | N/A | N/A | -   | -   | N/A | N/A | +  | ++ | -  | -  | -  |
| Worrall (1994)           | N/A | N/A | -   | -   | N/A | N/A | +  | ++ | -  | ++ | ++ |
| Zhang (2012)             | N/A | N/A | N/A | N/A | N/A | N/A | ++ | -  | +  | ++ | -  |
| Zhang (2019) ref ([163]) | +   | -   | N/A | N/A | ++  | -   | +  | +  | -  | -  | ++ |
| Zhang (2019) ref ([162]) | +   | -   | N/A | N/A | -   | -   | -  | +  | -  | -  | ++ |
| Zhang (2021) ref ([161]) | ++  | -   | N/A | N/A | -   | -   | +  | +  | +  | +  | ++ |
| Zhang (2021) ref ([160]) | +   | -   | N/A | N/A | -   | -   | +  | +  | +  | ++ | ++ |
| Zhao (2014)              | +   | -   | N/A | N/A | ++  | -   | +  | ++ | -  | ++ | -  |
| Zhu (2012)               | N/A | N/A | --  | --  | N/A | N/A | -  | -  | +  | ++ | -  |

## Supplementary Information – search strategy

Database: Medline (Ovid MEDLINE® Epub Ahead of Print, In-Process & Other Non-Indexed Citations, Ovid MEDLINE® Daily and Ovid MEDLINE®) 1946 to present

Search Strategy:

- 
- 1 exp Proteoglycans/ (39384)
  - 2 exp Elasticity/ (50892)
  - 3 (elasticity or "elastic modulus" or topograph\* or anisotrop\*).ti,ab. (160630)
  - 4 exp Extracellular Matrix/ (47818)
  - 5 "extracellular matri\*".ti,ab. (106140)
  - 6 exp Extracellular Matrix Proteins/ (193763)
  - 7 (Aggrecan\* or "Cartilage Specific Proteoglycan Core Proteins" or COMP or "Thrombospondin 5" or TSP5 or collagen\* or pro-collagen\* or procollagen or tropocollagen\* or fibulin\* or "alpha-collagen" or elastin\* or thropoelastin\* or fibrillin\* or fibronectin\* or glycoprotein\* or laminin\* or "glycoprotein GP-2" or "latent TGF beta binding protein" or matrilin\* or MATN\* or "matrix protein\*" or netrin\* or netrin-1 or biglycan\* or decorin\* or hyalectin\* or neurocan\* or fibromodulin\* or lumican\* or tenacin\* or tenacin-c or cytotactin\* or hexabrachion\* or versican\* or "chondroitin sulfate proteoglycan core protein 2" or "chondroitin sulphate proteoglycan core protein 2" or vitronectin\* or pyridinoline\* or hydroxylysylpyridinoline\*).ti,ab. (448428)
  - 8 microfibril\*.ti,ab. (4325)
  - 9 exp Glycosaminoglycans/ (121397)
  - 10 (glycosaminoglycan\* or mucopolysaccharide\* or proteoglycan\* or chondroitin or translagen or blutal or heparin or "heparinic acid" or heparitin or heparan or "hyaluronic acid" or hyaluron\*n or hyaluronate or keratan or keratosulphate or keratosulfate).ti,ab. (160866)
  - 11 Calcinosis/ (38846)
  - 12 (calcinosis or calcinoses or calcification\* or microcalcification\* or microcalcinosis or microcalcinoses or hydroxyapatite or hydroxylapatite).ti,ab. (93466)
  - 13 1 or 2 or 3 or 4 or 5 or 6 or 7 or 8 or 9 or 10 or 11 or 12 (1009050)
  - 14 exp Intervertebral Disc/ (15222)
  - 15 ("intervertebral dis\*" or "annulus fibrosus" or "anulus fibrosis" or "nucleus pulposus").ti,ab. (18128)
  - 16 exp Ligaments, Articular/ (32725)
  - 17 ligament\*.ti,ab. (85003)
  - 18 exp Muscle, Skeletal/ (283110)
  - 19 muscle\*.ti,ab. (744181)
  - 20 exp Tendons/ (44653)
  - 21 tendon\*.ti,ab. (70548)
  - 22 Menisci, Tibial/ (7362)
  - 23 (menisc\* or "semilunar cartilage\*").ti,ab. (18889)

- 24 exp Joint Capsule/ (29528)
- 25 ("joint capsule\*" or "articular capsule\*" or "capsula articularis" or "synovial capsule\*" or "synovial fold\*" or "synovial plica\*" or "hip capsule\*" or "knee capsule\*" or "shoulder capsule\*").ti,ab. (3859)
- 26 Bursa, Synovial/ (1124)
- 27 ("synovial bursa\*" or synovium or "synovial membrane\*").ti,ab. (11261)
- 28 exp Adipose Tissue/ (103687)
- 29 ("adipose tissue\*" or "body fat\*" or "body pad\*" or "fat\* tissue\*" or "fat pad\*").ti,ab. (123620)
- 30 14 or 15 or 16 or 17 or 18 or 19 or 20 or 21 or 22 or 23 or 24 or 25 or 26 or 27 or 28 or 29 (1173134)
- 31 exp Osteoarthritis/ (68777)
- 32 (osteoarthr\* or "degenerative arthri\*" or arthroses or arthrosis).ti,ab. (85531)
- 33 31 or 32 (105393)
- 34 13 and 30 and 33 (4268)
- 35 34 (4268)
- 36 limit 35 to yr="2020 - 2021" (490)

**Database: Embase 1974 to present**

Search Strategy:

- 
- 1 proteoglycan/ (24376)
  - 2 exp elasticity/ (69514)
  - 3 (elasticity or "elastic modulus" or topograph\* or anisotrop\*).ti,ab. (166957)
  - 4 exp extracellular matrix/ (153794)
  - 5 "extracellular matri\*".ti,ab. (134542)
  - 6 exp scleroprotein/ (346147)
  - 7 (Aggrecan\* or "Cartilage Specific Proteoglycan Core Proteins" or COMP or "Thrombospondin 5" or TSP5 or collagen\* or pro-collagen\* or procollagen or tropocollagen\* or fibulin\* or "alpha-collagen" or elastin\* or thropoelastin\* or fibrillin\* or fibronectin\* or glycoprotein\* or laminin\* or "glycoprotein GP-2" or "latent TGF beta binding protein" or matrilin\* or MATN\* or "matrix protein\*" or netrin\* or netrin-1 or biglycan\* or decorin\* or hyalectin\* or neurocan\* or fibromodulin\* or lumican\* or tenacin\* or tenacin-c or cytotactin\* or hexabrachion\* or versican\* or "chondroitin sulfate proteoglycan core protein 2" or "chondroitin sulphate proteoglycan core protein 2" or vitronectin\* or pyridinoline\* or hydroxylsypylpyridinoline\*).ti,ab. (555848)
  - 8 microfibril\*.ti,ab. (4450)
  - 9 exp glycosaminoglycan/ (250102)
  - 10 (glycosaminoglycan\* or mucopolysaccharide\* or proteoglycan\* or chondroitin or translagen or blutal or heparin or "heparinic acid" or heparitin or heparan or "hyaluronic acid" or hyaluron\*n or hyaluronate or keratan or keratosulphate or keratosulfate).ti,ab. (203041)
  - 11 exp calcinosis/ (16203)

- 12 (calcinosis or calcinosis or calcification\* or microcalcification\* or microcalcinosis or microcalcinosis or hydroxyapatite or hydroxylapatite).ti,ab. (118865)
- 13 1 or 2 or 3 or 4 or 5 or 6 or 7 or 8 or 9 or 10 or 11 or 12 (1369541)
- 14 exp intervertebral disk/ (16400)
- 15 ("intervertebral dis\*" or "annulus fibrosus" or "anulus fibrosis" or "nucleus pulposus").ti,ab. (21310)
- 16 exp joint ligament/ (28620)
- 17 ligament\*.ti,ab. (103603)
- 18 exp skeletal muscle/ (367283)
- 19 muscle\*.ti,ab. (919762)
- 20 exp tendon/ (41624)
- 21 tendon\*.ti,ab. (82988)
- 22 knee meniscus/ (10357)
- 23 (menisc\* or "semilunar cartilage\*").ti,ab. (22980)
- 24 joint capsule/ (3803)
- 25 ("joint capsule\*" or "articular capsule\*" or "capsula articularis" or "synovial capsule\*" or "synovial fold\*" or "synovial plica\*" or "hip capsule\*" or "knee capsule\*" or "shoulder capsule\*").ti,ab. (4819)
- 26 synovial bursa/ (2550)
- 27 ("synovial bursa\*" or synovium or "synovial membrane\*").ti,ab. (15675)
- 28 exp adipose tissue/ (176340)
- 29 ("adipose tissue\*" or "body fat\*" or "body pad\*" or "fat\* tissue\*" or "fat pad\*").ti,ab. (166084)
- 30 14 or 15 or 16 or 17 or 18 or 19 or 20 or 21 or 22 or 23 or 24 or 25 or 26 or 27 or 28 or 29 (1411380)
- 31 exp osteoporosis/ (138070)
- 32 (osteoarthr\* or "degenerative arthri\*" or arthroses or arthrosis).ti,ab. (119642)
- 33 31 or 32 (253893)
- 34 13 and 30 and 33 (6543)
- 35 34 (6543)
- 36 limit 35 to yr="2020 - 2021" (909)

## Scopus

(( TITLE-ABS-KEY ( elasticity OR "elastic modulus" OR topograph\* OR anisotrop\* OR "extracellular matri\*" OR aggrecan\* OR "Cartilage Specific Proteoglycan Core Proteins" OR comp OR "Thrombospondin 5" OR tsp5 OR collagen\* OR pro-collagen\* OR procollagen OR tropocollagen\* OR fibulin\* OR "alpha-collagen" OR elastin\* OR thropoelastin\* OR fibrillin\* OR fibronectin\* OR glycoprotein\* OR laminin\* OR "glycoprotein GP-2" OR "latent TGF beta binding protein" OR matrilin\* OR matn\* OR "matrix protein\*" OR netrin\* OR netrin-1 OR biglycan\* OR decorin\* OR hyalectin\* OR neurocan\* OR fibromodulin\* OR lumican\* OR tenacin\* OR tenacin-

c OR cytotactin\* OR hexabrachion\* OR versican\* OR "chondroitin sulfate proteoglycan core protein 2" OR "chondroitin sulphate proteoglycan core protein 2" OR vitronectin\* OR pyridinoline\* OR hydroxylysylpyridinoline\* ) OR TITLE-ABS-KEY ( microfibril\* OR glycosaminoglycan\* OR mucopolysaccharide\* OR proteoglycan\* OR chondroitin OR translagen OR blutal OR heparin OR "heparinic acid" OR heparitin OR heparan OR "hyaluronic acid" OR hyaluron\*n OR hyaluronate OR keratan OR keratosulphate OR keratosulfate OR calcinosis OR calcinoses OR calcification\* OR microcalcification\* OR microcalcinosis OR microcalcinoses OR hydroxyapatite OR hydroxylapatite ) ) AND ( ( TITLE-ABS-KEY ( ( "intervertebral dis\*" OR "annulus fibrosus" OR "anulus fibrosis" OR "nucleus pulposus" ) ) OR TITLE-ABS-KEY ( ligament\* OR muscle\* OR tendon\* OR menisc\* OR "semilunar cartilage\*" OR ( "joint capsule\*" OR "articular capsule\*" OR "capsula articularis" OR "synovial capsule\*" OR "synovial fold\*" OR "synovial plica\*" OR "hip capsule\*" OR "knee capsule\*" OR "shoulder capsule\*" ) OR ( "synovial bursa\*" OR synovium OR "synovial membrane\*" ) OR ( "adipose tissue\*" OR "body fat\*" OR "body pad\*" OR "fat tissue\*" OR "fat pad\*" ) ) ) ) AND ( TITLE-ABS-KEY ( osteoarthr\* OR "degenerative arthri\*" OR arthroses OR arthrosis ) ) AND ( LIMIT-TO ( PUBYEAR , 2022 ) OR LIMIT-TO ( PUBYEAR , 2021 ) OR LIMIT-TO ( PUBYEAR , 2020 ) )
